# Supplementary material
Source: Research Square preprint supplement (doi:10.21203/rs.3.rs-9673044/v1)
Supplement: Supplementary file 1 [file 60781388dde8a1a00ca75434.docx]

**Supp Table 1. Network Stability and Accuracy Indices**

| Metric | Value | Interpretation |
| --- | --- | --- |
| CS-coefficient (Strength) | **0.75** | Excellent stability |
| Max case-drop proportion | 75.1% | Robust centrality estimates |
| Bootstrap iterations | 2,000 | High precision |

**Supp Table 2 Age-Based Network Comparison Test Results**

| Test | Statistic | p-value | Interpretation |
| --- | --- | --- | --- |
| Global strength difference | – | 0.352 | Not significant |
| Network structure difference | – | >0.05 | No global structural difference |

**Supp Table 3. Node Strength Differences Between Age Groups (NCT)**

| Symptom | p-value | Interpretation |
| --- | --- | --- |
| anx1 | 0.597 | NS |
| anx2 | 0.831 | NS |
| anx3 | 0.400 | NS |
| anx4 | 0.083 | Trend-level |
| anx5 | 0.710 | NS |
| anx6 | 0.147 | NS |
| anx7 | 0.115 | NS |
| dep1 | 0.111 | NS |
| dep2 | 0.130 | NS |
| dep3 | 0.726 | NS |
| dep4 | 0.614 | NS |
| dep5 | 0.830 | NS |
| dep6 | 0.053 | Trend-level |
| dep7 | **0.011** | Significant |

*NS = not significant.*

**Supp Figure 1.** Edge weight accuracy: nonparametric bootstrap confidence intervals


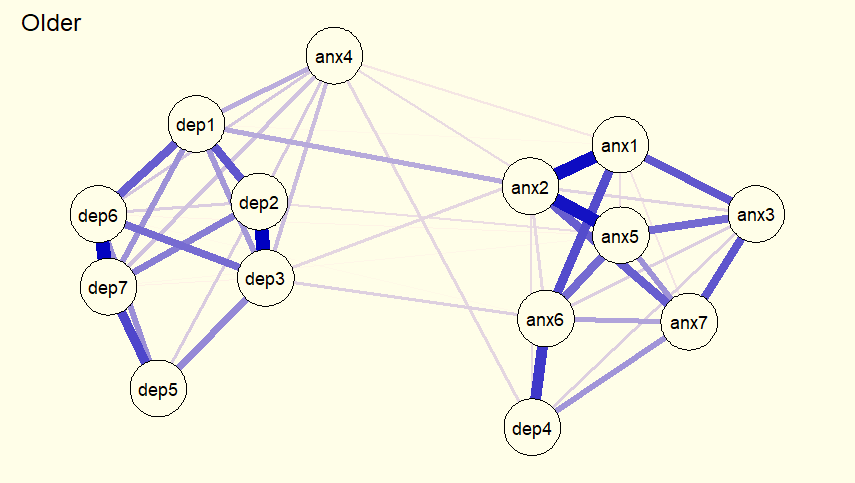


**Supp Figure 2.** Age-based network comparison: node strength differences


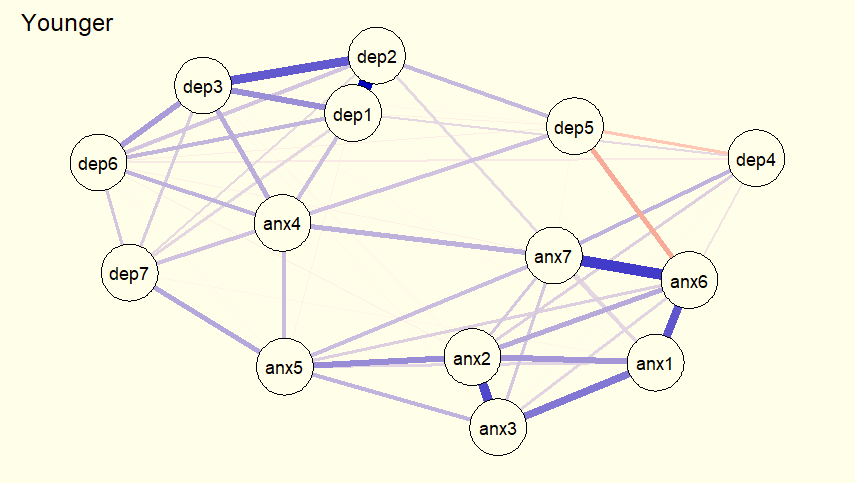


**Supp Figure 3: HADS Items Descriptive Statics**

**Supp Figure 4: Centrality Indices**


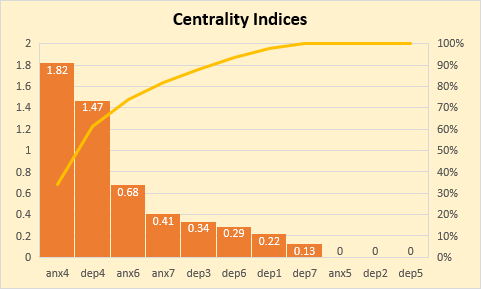


**Supp Figure 5: Bridge Centrality Metrics**

**Supp Figure 6: Network Stability and Accuracy Indices**


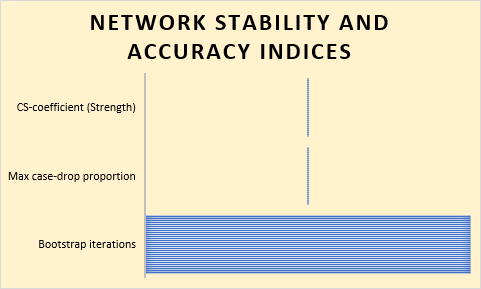


**Supp Figure 6: p value of HADS items**
